# Supplementary material for: Reduction of N2 to NH3 by TiO2-supported Ni cluster catalysts: a DFT study
Source: Royal Society of Chemistry journal article supplement (doi:10.1039/d1cp00859e), 2021-01-01
Supplement: d1cp00859e1.pdf [file d1cp00859e1.pdf]

## Reduction of N<sub>2</sub> to NH<sub>3</sub> by TiO<sub>2</sub>-supported Ni cluster catalysts: A DFT study

Huiru Yang,<sup>a#</sup> DanLuo,<sup>b,c #</sup> Rui Gao,<sup>b</sup> Dandan Wang,<sup>\*a</sup> Haibo Li,<sup>a</sup> Zhao Zhao,<sup>a</sup> Ming Feng,<sup>\*a</sup> Zhongwei Chen<sup>\*b</sup>

<sup>a</sup>Key Laboratory of Functional Materials Physics and Chemistry of the Ministry of Education, College of Physics, Jilin Normal University, Siping 136000, China.

<sup>b</sup>Department of Chemical Engineering, University of Waterloo, 200 University Avenue West, Waterloo, ON, Canada, N2L3G1.

<sup>c</sup>School of Information and Optoelectronic Science and Engineering, South China Normal University, Guangzhou 510006, Guangdong, China.

\*Corresponding authors emails: mila880227@126.com (D. D. Wang), mingfeng@jlnu.edu.cn (M. Feng), zhwchen@uwaterloo.ca (Z. Chen).

#The authors contribute equally to this work.

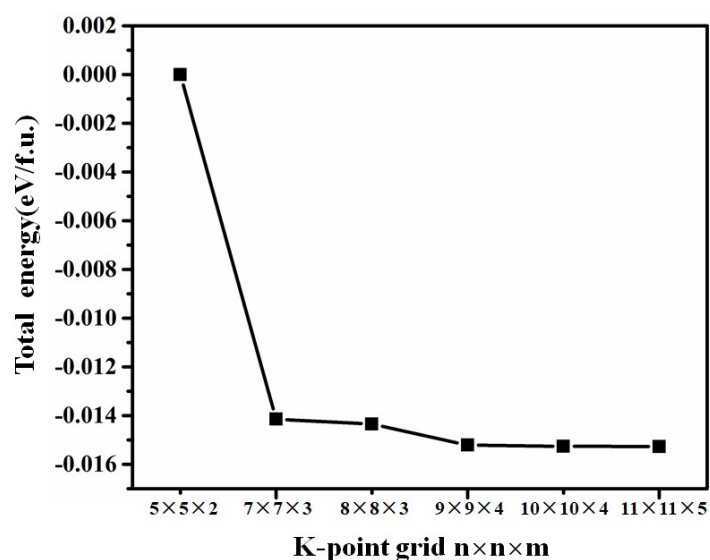

Figure S1. Convergence test of the k-point grid for the total energy (eV/formula-unit) of TiO<sub>2</sub> unit cell. Convergence at 9x9x4 k-point grid is within 0.5 meV/atom.

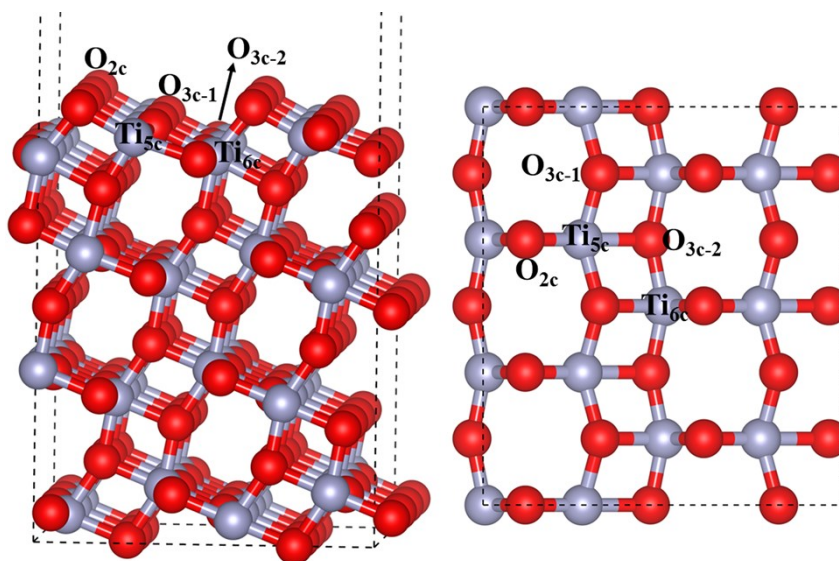

Figure S2. Side (left) and top (right) views of the optimized  $\text{TiO}_2$  (101) surface. Red and silver balls are O and Ti atoms, respectively. The characters  $\text{O}_{2c}$ ,  $\text{O}_{3c-1}$ ,  $\text{O}_{3c-2}$ ,  $\text{Ti}_{5c}$  and  $\text{Ti}_{6c}$  respectively represent the surface two-coordinated O atoms, three-coordinated O atoms, five-coordinated and six coordinated Ti atoms.

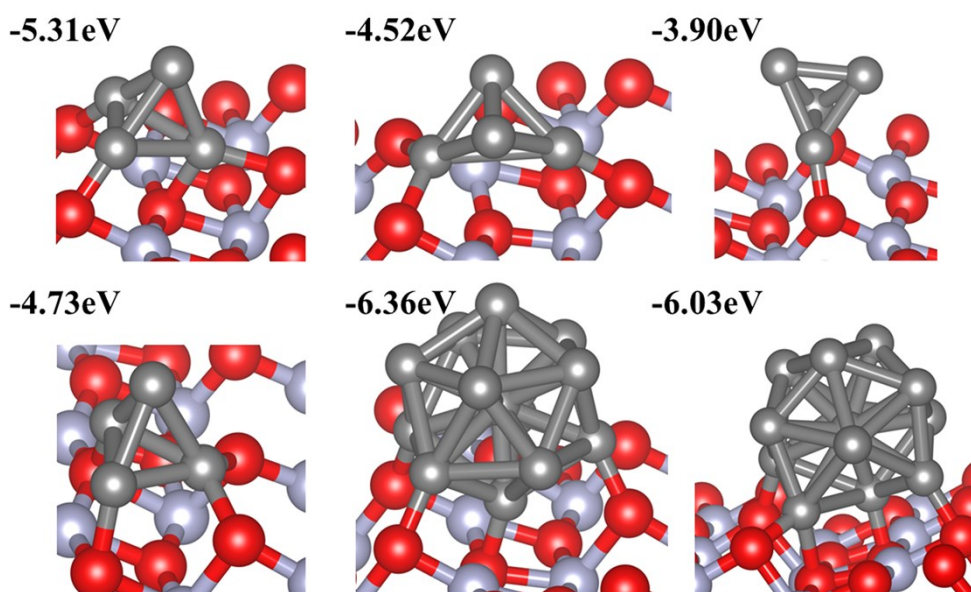

Figure S3. The optimized configurations and corresponding adsorption energies for  $\text{Ni}_4$  and  $\text{Ni}_{13}$  clusters anchoring on  $\text{TiO}_2$  surface. Dark grey, red and silver balls are Ni, O and Ti atoms, respectively.

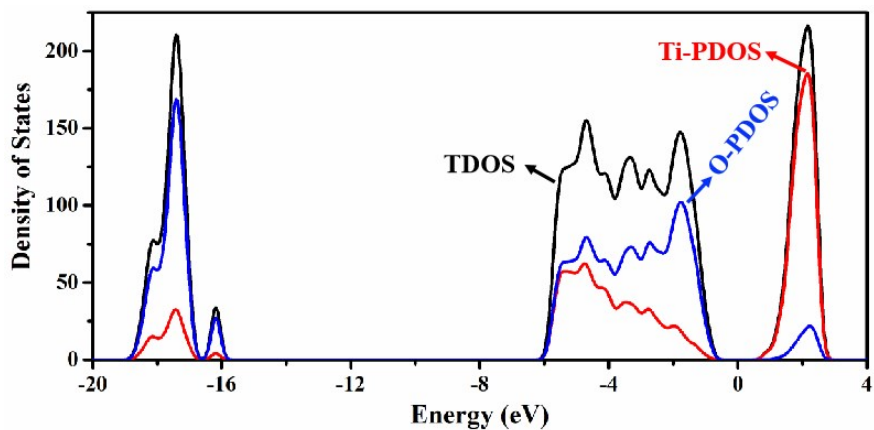

Figure S4. PDOS of pristine  $\text{TiO}_2$  (101) surface.

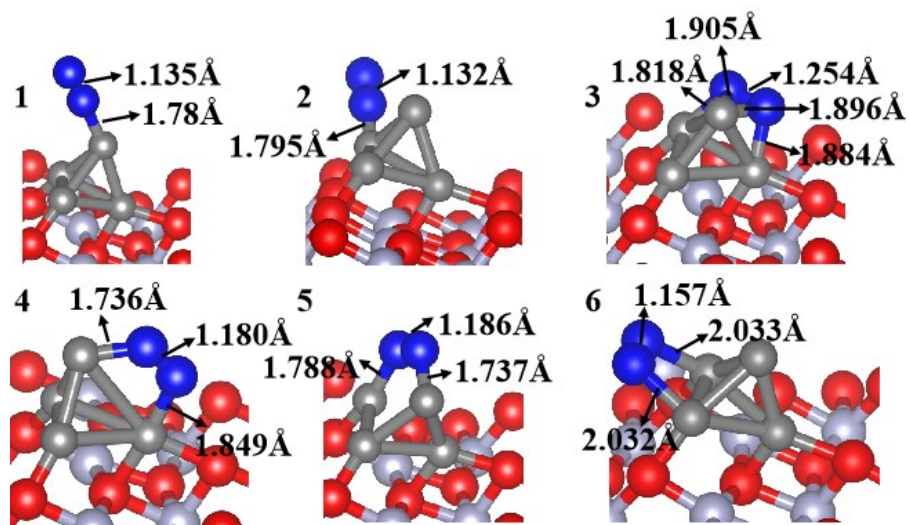

Figure S5. The optimized configurations and corresponding adsorption energies for  $\text{N}_2$  adsorption on  $\text{Ni}_4\text{-TiO}_2$  (101). Dark grey, blue, red and silver balls are Ni, N, O and Ti atoms, respectively.

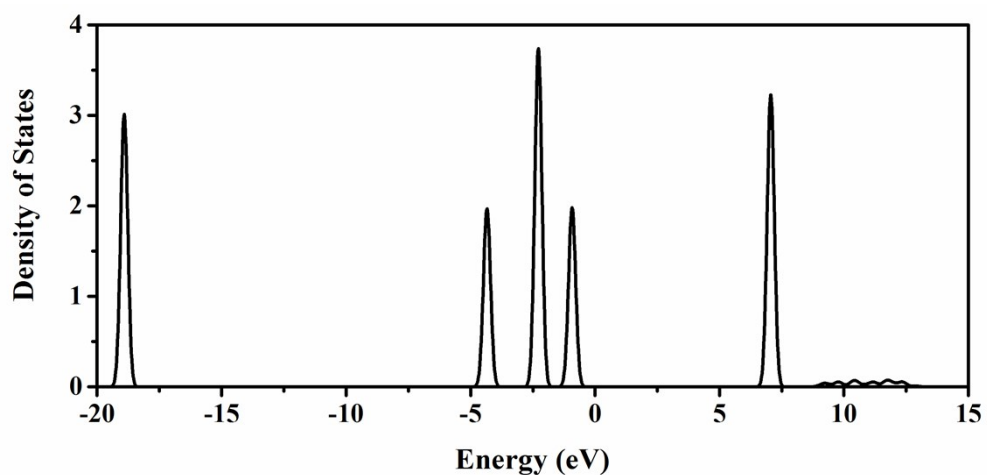

Figure S6. PDOS for N atoms of gas  $\text{N}_2$  molecule. The PDOS plots for two N atoms overlap completely.

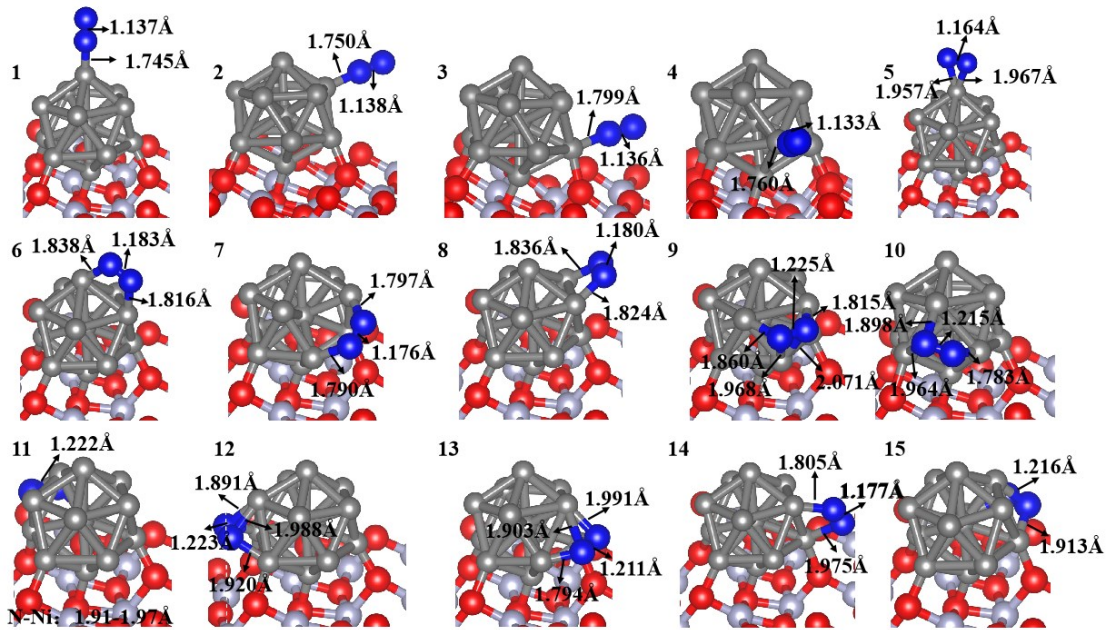

Figure S7. The optimized configurations and corresponding adsorption energies for N<sub>2</sub> adsorption on Ni<sub>13</sub>-TiO<sub>2</sub>(101). Dark grey, blue, red and silver balls are Ni, N, O and Ti atoms, respectively.

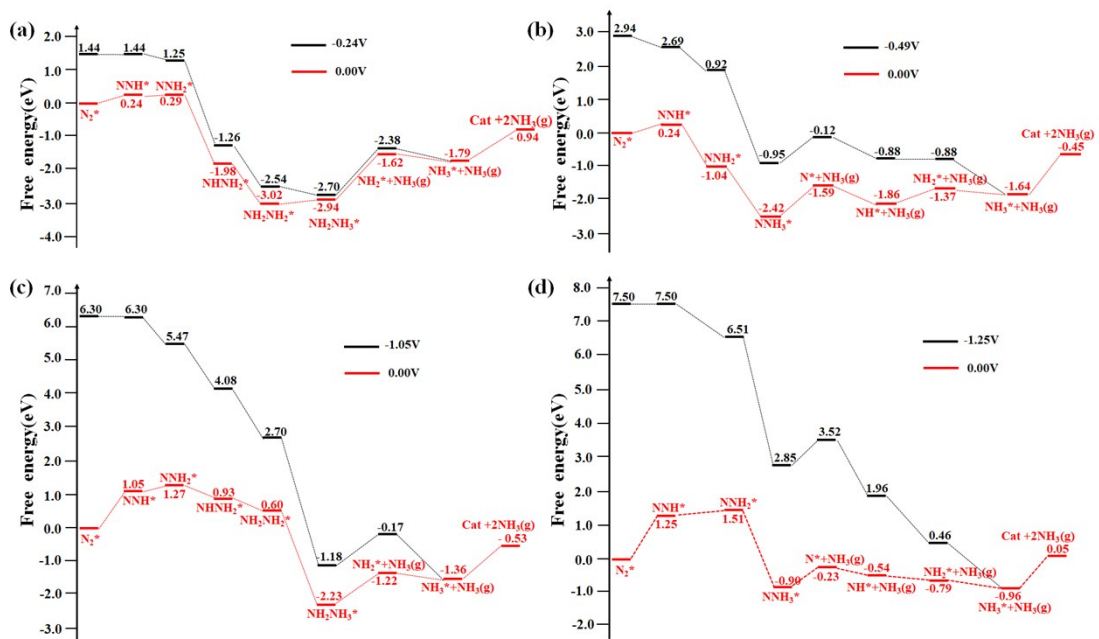

Figure S8. The Gibbs free energies for the nitrogen reduction reaction (NRR) on Ni<sub>4</sub>/Ni<sub>13</sub>-TiO<sub>2</sub>(101) catalyst at no energy input as well as limiting potential is shown in red and black line, respectively: (a) N<sub>2</sub> adsorbed on Ni<sub>4</sub>-TiO<sub>2</sub>(101) in side-on configuration (Configuration 3); (b) N<sub>2</sub> adsorbed on Ni<sub>13</sub>-TiO<sub>2</sub>(101) in side-on configuration (Configuration 9); (c) N<sub>2</sub> adsorbed on Ni<sub>4</sub>-TiO<sub>2</sub>(101) in end-on configuration (Configuration 1); (d) N<sub>2</sub> adsorbed on Ni<sub>13</sub>-TiO<sub>2</sub>(101) in end-on configuration (Configuration 1).

Table S1. N-N bond length ( $L_{N-N}$ ) for each intermediate in NRR process on  $TiO_2(101)$  supported Ni clusters.

|                                   | Configuration | intermediate       | $L_{N-N}(\text{\AA})$ |                     | Configuration | intermediate    | $L_{N-N}(\text{\AA})$ |         |
|-----------------------------------|---------------|--------------------|-----------------------|---------------------|---------------|-----------------|-----------------------|---------|
|                                   | $Ni_4-TiO_2$  | 1 (end-on)         | $N_2^*$               |                     | 1.135         | $Ni_{13}-TiO_2$ | 1 (end-on)            | $N_2^*$ |
| NNH*                              |               |                    | 1.213                 | NNH*                | 1.205         |                 |                       |         |
| NNH <sub>2</sub> *                |               |                    | 1.277                 | NNH <sub>2</sub> *  | 1.278         |                 |                       |         |
| NHNH*                             |               |                    | 1.276                 | NHNH*               | 1.278         |                 |                       |         |
| NNH <sub>3</sub> *                |               |                    | 1.488                 | NHNH <sub>2</sub> * | 1.366         |                 |                       |         |
| NHNH <sub>2</sub> *               |               |                    | 1.372                 | 9 (side-on)         | $N_2^*$       |                 |                       | 1.225   |
| NH <sub>2</sub> NH <sub>2</sub> * |               |                    | 1.454                 |                     | NNH*          |                 |                       | 1.332   |
| 3 (side-on)                       |               | $N_2^*$            | 1.254                 |                     | NHNH*         |                 | 1.387                 |         |
|                                   |               | NNH*               | 1.345                 |                     |               |                 |                       |         |
|                                   |               | NNH <sub>2</sub> * | 1.441                 |                     |               |                 |                       |         |
|                                   |               | NHNH*              | 1.397                 |                     |               |                 |                       |         |

Table S2. ZPE and TS (T=300K) values for NRR process of  $N_2^*$  on  $Ni_4-TiO_2(101)$  in configuration 1 and 3.

| Configuration 1                   | ZPE (eV) | TS (eV) | Configuration 3                   | ZPE (eV) | TS (eV) |
|-----------------------------------|----------|---------|-----------------------------------|----------|---------|
| $N_2^*$                           | 0.21     | 0.15    | $N_2^*$                           | 0.20     | 0.08    |
| NNH*                              | 0.47     | 0.19    | NNH*                              | 0.52     | 0.07    |
| NHNH*                             | 0.80     | 0.21    | NHNH*                             | 0.85     | 0.08    |
| NNH <sub>2</sub> *                | 0.81     | 0.19    | NNH <sub>2</sub> *                | 0.87     | 0.08    |
| NHNH <sub>2</sub> *               | 1.12     | 0.22    | NHNH <sub>2</sub> *               | 1.09     | 0.15    |
| NH <sub>2</sub> NH <sub>2</sub> * | 1.48     | 0.26    | NNH <sub>3</sub> *                | 1.16     | 0.13    |
| NH <sub>2</sub> NH <sub>3</sub> * | 1.75     | 0.20    | NHNH <sub>3</sub> *               | 1.42     | 0.18    |
| NNH <sub>3</sub> *                | 1.13     | 0.21    | NH <sub>2</sub> NH <sub>2</sub> * | 1.45     | 0.12    |
| N*                                | 0.07     | 0.11    | NH <sub>2</sub> NH <sub>3</sub> * | 1.76     | 0.18    |
| NH*                               | 0.36     | 0.06    | N*                                | 0.12     | 0.02    |
| NH <sub>2</sub> *                 | 0.70     | 0.07    | NH*                               | 0.40     | 0.03    |
| NH <sub>3</sub> *                 | 1.02     | 0.18    | NH <sub>2</sub> *                 | 0.70     | 0.07    |
|                                   |          |         | NH <sub>3</sub> *                 | 1.05     | 0.11    |

Table S3. The energy barriers ( $E_{\text{barrier}}$ ) of rate-determining step in NRR process.

| This work            |                 | $E_{\text{barrier}}$ (eV) | Reported work                                      | $E_{\text{barrier}}$ (eV) |
|----------------------|-----------------|---------------------------|----------------------------------------------------|---------------------------|
| $Ni_4-TiO_2(101)$    | Configuration 1 | 0.73                      | FeN <sub>4</sub> [1]                               | 0.85                      |
|                      | Configuration 3 | 0.32                      | MnO [2]                                            | 1.88                      |
| $Ni_{13}-TiO_2(101)$ | Configuration 1 | 1.66                      | C-doped $TiO_2/C$ [3]                              | 0.64                      |
|                      |                 |                           | MoS <sub>2</sub> [4]                               | 0.68                      |
|                      | Configuration 9 | 0.51                      | $TiO_2(101)/Ti_3C_2T_x$ [5]                        | 0.40                      |
|                      |                 |                           | electron-deficient Cu nanoparticles [6]            | 1.60                      |
|                      |                 |                           | Au <sub>1</sub> /C <sub>3</sub> N <sub>4</sub> [7] | 1.33                      |
|                      |                 |                           | N-C@NiO/GP [8]                                     | 1.23                      |

Table S4. ZPE and TS (T=300K) values for NRR process of N<sub>2</sub>\* on Ni<sub>13</sub>-TiO<sub>2</sub>(101) in configuration 1 and 9.

| Configuration 1      | ZPE (eV) | TS (eV) | Configuration 3                   | ZPE (eV) | TS (eV) |
|----------------------|----------|---------|-----------------------------------|----------|---------|
| N <sub>2</sub> *     | 0.20     | 0.21    | N <sub>2</sub> *                  | 0.18     | 0.11    |
| NNH*                 | 0.47     | 0.47    | NNH*                              | 0.50     | 0.09    |
| NHNNH*               | 0.81     | 0.21    | NHNNH*                            | 0.83     | 0.09    |
| NNH <sub>2</sub> *   | 0.80     | 0.20    | NNH <sub>2</sub> *                | 0.81     | 0.09    |
| NHNNH <sub>2</sub> * | 1.14     | 0.21    | NHNNH <sub>2</sub> *              | 1.06     | 0.14    |
| NHNNH <sub>3</sub> * | 1.42     | 0.21    | NNH <sub>3</sub> *                | 1.14     | 0.15    |
| NNH <sub>3</sub> *   | 1.14     | 0.17    | NHNNH <sub>3</sub> *              | 1.40     | 0.19    |
| N*                   | 0.10     | 0.02    | NH <sub>2</sub> NH <sub>2</sub> * | 1.41     | 0.14    |
| NH*                  | 0.38     | 0.04    | NH <sub>2</sub> NH <sub>3</sub> * | 1.73     | 0.25    |
| NH <sub>2</sub> *    | 0.70     | 0.08    | N*                                | 0.10     | 0.02    |
| NH <sub>3</sub> *    | 1.04     | 0.15    | NH*                               | 0.39     | 0.03    |
|                      |          |         | NH <sub>2</sub> *                 | 0.70     | 0.07    |
|                      |          |         | NH <sub>3</sub> *                 | 1.04     | 0.11    |

Table S5. Computed frequencies for each intermediate structures in NRR process of adsorbed N<sub>2</sub> in configuration 1 on Ni<sub>4</sub>-TiO<sub>2</sub> (101) catalyst.

| Structure               | Frequency (THz) | Structure                            | Frequency (THz) | Structure                            | Frequency (THz) | Structure              | Frequency (THz) |
|-------------------------|-----------------|--------------------------------------|-----------------|--------------------------------------|-----------------|------------------------|-----------------|
| <b>N<sub>2</sub>*</b>   | 66.373611       | <b>NHNH<sub>2</sub>*</b>             | 106.561040      | <b>NH<sub>2</sub>NH<sub>3</sub>*</b> | 47.652733       | <b>NH<sub>2</sub>*</b> | 103.696434      |
|                         | 11.037772       |                                      | 103.110487      |                                      | 44.899527       |                        | 101.121580      |
|                         | 8.996761        |                                      | 99.575185       |                                      | 36.348894       |                        | 44.580160       |
|                         | 8.651273        |                                      | 48.239377       |                                      | 22.966354       |                        | 20.558257       |
|                         | 2.671124        |                                      | 43.145378       |                                      | 22.529673       |                        | 19.854807       |
|                         | 2.466002        |                                      | 35.272318       |                                      | 20.075969       |                        | 18.370221       |
| <b>NNH*</b>             | 94.457163       |                                      | 34.999001       |                                      | 19.981173       | 16.122828              |                 |
|                         | 52.155676       |                                      | 21.603991       |                                      | 18.682670       | 12.361258              |                 |
|                         | 32.839154       |                                      | 13.936664       |                                      | 15.276501       | 4.232470               |                 |
|                         | 16.016818       |                                      | 13.119399       |                                      | 14.154425       | 103.442272             |                 |
|                         | 15.119209       |                                      | 9.655198        |                                      | 11.919058       | 103.296612             |                 |
|                         | 9.340287        |                                      | 5.937369        |                                      | 5.549476        | 100.679046             |                 |
|                         | 5.808344        |                                      | 4.411993        |                                      | 5.229605        | 48.353819              |                 |
|                         | 2.318402        |                                      | 2.601207        |                                      | 4.183259        | 47.868596              |                 |
| 0.983892                | 1.403684        | 2.092944                             | 35.888090       |                                      |                 |                        |                 |
| <b>NHNH*</b>            | 96.246750       | <b>NH<sub>2</sub>NH<sub>2</sub>*</b> | 104.225166      | <b>NNH<sub>3</sub>*</b>              | 99.718320       | <b>NH<sub>3</sub>*</b> | 18.214774       |
|                         | 92.316598       |                                      | 102.021041      |                                      | 98.442398       |                        | 17.599372       |
|                         | 45.131108       |                                      | 101.346293      |                                      | 91.511597       |                        | 10.471807       |
|                         | 42.741338       |                                      | 99.192051       |                                      | 47.444998       |                        | 3.340028        |
|                         | 39.653067       |                                      | 48.835078       |                                      | 46.670856       |                        | 2.101497        |
|                         | 30.940970       |                                      | 48.087011       |                                      | 40.700379       |                        | 1.653625        |
|                         | 15.058249       |                                      | 39.804537       |                                      | 30.246401       |                        |                 |
|                         | 13.015273       |                                      | 37.126560       |                                      | 29.776817       |                        |                 |
|                         | 7.505012        |                                      | 33.582196       |                                      | 21.816061       |                        |                 |
|                         | 3.115836        |                                      | 31.569718       |                                      | 17.19082        |                        |                 |
|                         | 2.385300        |                                      | 25.062278       |                                      | 8.331983        |                        |                 |
|                         | 1.005224        |                                      | 18.625560       |                                      | 6.768291        |                        |                 |
| <b>NNH<sub>2</sub>*</b> | 101.888639      | <b>NH<sub>2</sub>NH<sub>3</sub>*</b> | 10.617313       | <b>N*</b>                            | 4.785697        |                        |                 |
|                         | 98.004936       |                                      | 7.244151        |                                      | 1.758863        |                        |                 |
|                         | 47.678371       |                                      | 3.654317        |                                      | 1.446667        |                        |                 |
|                         | 41.651991       |                                      | 2.597983        |                                      | 27.290455       |                        |                 |
|                         | 35.976563       |                                      | 2.400130        |                                      | 3.036654        |                        |                 |
|                         | 18.319095       |                                      | 1.207084        |                                      | 1.559696        |                        |                 |
|                         | 15.709908       | 102.860222                           | 95.754715       |                                      |                 |                        |                 |
|                         | 15.021463       | 102.771221                           | 22.860446       |                                      |                 |                        |                 |
|                         | 8.035964        | 102.426766                           | 20.03443        |                                      |                 |                        |                 |
|                         | 5.258421        | 100.629157                           | 19.346373       |                                      |                 |                        |                 |
|                         | 2.842582        | 100.117225                           | 14.300271       |                                      |                 |                        |                 |
|                         | 1.306419        | 48.239819                            | 3.660941        |                                      |                 |                        |                 |

Table S6. Computed frequencies for each intermediate structures in NRR process of adsorbed N<sub>2</sub> in configuration 3 on Ni<sub>4</sub>-TiO<sub>2</sub> (101) catalyst.

| Structure          | Frequency (THz) | Structure           | Frequency (THz) | Structure         | Frequency (THz) | Structure                         | Frequency (THz) |
|--------------------|-----------------|---------------------|-----------------|-------------------|-----------------|-----------------------------------|-----------------|
| N2*                | 42.030493       | NHNH <sub>2</sub> * | 103.467568      | NNH3*             | 24.346190       | NH <sub>2</sub> NH <sub>3</sub> * | 18.941959       |
|                    | 13.946754       |                     | 101.382406      |                   | 23.427832       |                                   | 18.264414       |
|                    | 13.025423       |                     | 99.982626       |                   | 21.485554       |                                   | 14.796869       |
|                    | 10.595273       |                     | 45.845598       |                   | 16.934416       |                                   | 13.628680       |
|                    | 9.877396        |                     | 23.970775       |                   | 12.179112       |                                   | 12.742424       |
|                    | 6.627987        |                     | 23.144141       |                   | 11.251599       |                                   | 6.243197        |
| NNH*               | 99.653101       |                     | 22.049158       | 9.303302          | N*              | 5.500248                          |                 |
|                    | 36.142967       |                     | 20.030327       | 5.557533          |                 | 5.012818                          |                 |
|                    | 33.965184       |                     | 20.030327       | 2.940922          |                 | 2.760025                          |                 |
|                    | 21.318246       |                     | 16.823711       | 103.593091        | NH*             | 25.029467                         |                 |
|                    | 16.357932       |                     | 15.900454       | 102.962562        |                 | 16.127661                         |                 |
|                    | 14.892892       |                     | 14.369173       | 100.458453        |                 | 15.061739                         |                 |
|                    | 12.777228       | 11.236524           | 98.503917       | 100.396509        |                 |                                   |                 |
|                    | 10.907468       | 5.078300            | 48.197073       | 23.468374         |                 |                                   |                 |
| 7.624935           | 1.640303        | 47.672367           | 22.932780       |                   |                 |                                   |                 |
| NHNH*              | 99.164783       | 103.129150          | 36.260482       | NH <sub>2</sub> * | 18.466632       |                                   |                 |
|                    | 98.638550       | 103.058600          | 22.374804       |                   | 17.261462       |                                   |                 |
|                    | 41.369031       | 101.101747          | 20.830515       |                   | 12.074383       |                                   |                 |
|                    | 37.365656       | 100.801616          | 20.463851       | NH <sub>3</sub> * | 103.548049      |                                   |                 |
|                    | 31.453344       | 45.696793           | 19.818798       |                   | 101.264478      |                                   |                 |
|                    | 24.913428       | 45.534389           | 16.716584       |                   | 44.619053       |                                   |                 |
|                    | 20.870408       | 24.513992           | 14.640365       |                   | 20.745144       |                                   |                 |
|                    | 15.342554       | 22.912388           | 12.949751       |                   | 19.983611       |                                   |                 |
|                    | 14.020996       | 22.292246           | 6.554100        |                   | 18.361945       |                                   |                 |
|                    | 12.328181       | 21.318154           | 5.682058        |                   | 16.432165       |                                   |                 |
|                    | 10.084386       | 20.548478           | 4.082367        |                   | 12.189586       |                                   |                 |
| 7.086324           | 19.860561       | 2.727673            | 4.283590        |                   |                 |                                   |                 |
| NNH <sub>2</sub> * | 101.612516      | 17.632137           | 102.419884      | NH <sub>3</sub> * | 104.307713      |                                   |                 |
|                    | 99.244839       | 17.031815           | 101.772994      |                   | 102.909025      |                                   |                 |
|                    | 46.756071       | 12.768628           | 101.195606      |                   | 99.122604       |                                   |                 |
|                    | 35.252543       | 12.025212           | 100.161871      |                   | 48.279025       |                                   |                 |
|                    | 32.292721       | 5.377287            | 99.794719       |                   | 47.951568       |                                   |                 |
|                    | 25.197789       | 4.332088            | 48.348913       |                   | 36.488377       |                                   |                 |
|                    | 21.861760       | 104.172786          | 47.715008       |                   | 21.136471       |                                   |                 |
|                    | 16.711071       | 102.682480          | 44.735705       |                   | 19.812275       |                                   |                 |
|                    | 14.338509       | 91.078265           | 37.922363       |                   | 11.139363       |                                   |                 |
|                    | 13.918281       | 48.418889           | 23.911752       |                   | 7.519373        |                                   |                 |
|                    | 8.563626        | 47.673862           | 23.305559       |                   | 5.687167        |                                   |                 |
|                    | 5.304044        | 37.295859           | 20.626617       |                   | 3.603594        |                                   |                 |



Table S7. Computed frequencies for each intermediate structures in NRR process of adsorbed N<sub>2</sub> in configuration 1 on Ni<sub>13</sub>-TiO<sub>2</sub> (101) catalyst.

| Structure          | Frequency (THz) | Structure           | Frequency (THz) | Structure           | Frequency (THz) | Structure         | Frequency (THz) |
|--------------------|-----------------|---------------------|-----------------|---------------------|-----------------|-------------------|-----------------|
| N <sub>2</sub> *   | 66.129920       | NNH <sub>2</sub> *  | 41.647681       | NHNH <sub>3</sub> * | 35.775791       | NH*               | 100.439568      |
|                    | 12.141324       |                     | 35.656237       |                     | 22.051307       |                   | 21.410353       |
|                    | 9.366344        |                     | 17.533109       |                     | 21.624176       |                   | 20.621858       |
|                    | 9.100778        |                     | 15.225087       |                     | 19.112788       |                   | 17.380185       |
|                    | 0.705870        |                     | 13.560093       |                     | 18.486082       |                   | 12.996618       |
|                    | 0.703226        |                     | 6.467371        |                     | 17.352954       |                   | 12.583395       |
| NNH*               | 95.055757       | NNH <sub>2</sub> *  | 5.373016        | NHNH <sub>3</sub> * | 13.253029       | NH <sub>2</sub> * | 103.792163      |
|                    | 54.504710       |                     | 3.251519        |                     | 12.037089       |                   | 101.554315      |
|                    | 29.914206       |                     | 1.033085        |                     | 11.362295       |                   | 44.921522       |
|                    | 14.951513       | 106.026018          | 4.734518        |                     | 20.472440       |                   |                 |
|                    | 10.478474       | 102.219455          | 2.668658        |                     | 19.734825       |                   |                 |
|                    | 9.579061        | 101.099980          | 1.503674        |                     | 18.718272       |                   |                 |
|                    | 7.617110        | 47.830917           | 104.516513      |                     | 14.563843       |                   |                 |
|                    | 2.946185        | 43.150724           | 104.033506      |                     | 10.191477       |                   |                 |
| 1.932160           | 35.714612       | 101.493513          | 3.640899        |                     |                 |                   |                 |
| NHNH*              | 96.364245       | NHNH <sub>2</sub> * | 34.879499       | NHNH <sub>3</sub> * | 48.633492       | NH <sub>3</sub> * | 103.640602      |
|                    | 94.250363       |                     | 21.521715       |                     | 48.540548       |                   | 103.523957      |
|                    | 45.343331       |                     | 19.244408       |                     | 35.752993       |                   | 101.236650      |
|                    | 42.453697       |                     | 14.876302       |                     | 18.999383       |                   | 48.388365       |
|                    | 39.663387       |                     | 11.156787       |                     | 18.784253       |                   | 48.203042       |
|                    | 31.375973       |                     | 7.067243        |                     | 17.610344       |                   | 35.839301       |
|                    | 14.551344       | 3.558871            | 16.759664       |                     | 18.905240       |                   |                 |
|                    | 14.167144       | 2.881129            | 15.200664       |                     | 18.387773       |                   |                 |
|                    | 7.069492        | 1.154130            | 10.676834       |                     | 11.891922       |                   |                 |
|                    | 3.893493        | 104.339455          | 5.696931        |                     | 5.482874        |                   |                 |
|                    | 1.766707        | 103.774452          | 3.379973        |                     | 3.071496        |                   |                 |
|                    | 1.137951        | 101.081225          | 2.761643        |                     | 2.256824        |                   |                 |
| NNH <sub>2</sub> * | 101.506522      | NHNH <sub>3</sub> * | 99.542959       | N*                  | 18.088372       |                   |                 |
|                    | 98.112857       |                     | 48.581995       |                     | 16.714061       |                   |                 |
|                    | 48.148630       |                     | 48.205222       |                     | 15.886668       |                   |                 |

Table S8. Computed frequencies for each intermediate structures in NRR process of adsorbed N<sub>2</sub> in configuration 9 on Ni<sub>13</sub>-TiO<sub>2</sub> (101) catalyst.

| Structure           | Frequency (THz) | Structure           | Frequency (THz) | Structure                         | Frequency (THz)   | Structure                         | Frequency (THz)   |           |
|---------------------|-----------------|---------------------|-----------------|-----------------------------------|-------------------|-----------------------------------|-------------------|-----------|
| N <sub>2</sub> *    | 46.076984       | NHNH <sub>2</sub> * | 103.914362      | NNH3*                             | 21.511034         | NH <sub>2</sub> NH <sub>3</sub> * | 18.085361         |           |
|                     | 12.264056       |                     | 100.888467      |                                   | 20.181132         |                                   | 17.801626         |           |
|                     | 11.302827       |                     | 99.298164       |                                   | 19.325598         |                                   | 14.913265         |           |
|                     | 7.579236        |                     | 44.883659       |                                   | 16.529627         |                                   | 11.676204         |           |
|                     | 6.614807        |                     | 22.608057       |                                   | 11.418972         |                                   | 11.401770         |           |
|                     | 4.294890        |                     | 20.982547       |                                   | 10.547923         |                                   | 4.962074          |           |
| NNH*                | 99.128913       |                     | 20.286864       | 6.928376                          | N*                | 4.435595                          | NH*               | 19.683172 |
|                     | 36.715415       |                     | 19.858942       | 4.694874                          |                   | 2.810851                          |                   |           |
|                     | 34.174444       |                     | 18.406344       | 3.802253                          |                   | 1.001094                          |                   |           |
|                     | 19.902830       |                     | 15.796546       | 104.073655                        |                   | 19.683172                         |                   |           |
|                     | 14.742159       |                     | 15.203059       | 102.553914                        |                   | 16.683177                         |                   |           |
|                     | 13.817695       |                     | 10.775387       | 98.413071                         |                   | 12.133879                         |                   |           |
|                     | 9.623988        |                     | 10.299728       | 97.652792                         |                   | 100.699496                        |                   |           |
| NHNH*               | 8.494814        |                     | 4.481872        | 48.273282                         | NH <sub>2</sub> * | 22.175308                         | NH <sub>3</sub> * | 20.789586 |
|                     | 6.593340        | 3.666753            | 48.042108       | 17.542370                         |                   |                                   |                   |           |
|                     | 99.987294       | 103.420061          | 35.360496       | 14.835456                         |                   |                                   |                   |           |
|                     | 99.584720       | 102.932264          | 20.167680       | 13.092284                         |                   |                                   |                   |           |
|                     | 41.066329       | 100.744371          | 19.956492       | 103.249647                        |                   |                                   |                   |           |
|                     | 36.914569       | 100.113680          | 19.095973       | 100.460975                        |                   |                                   |                   |           |
|                     | 31.313303       | 45.217001           | 18.130681       | 44.598058                         |                   |                                   |                   |           |
|                     | 22.642062       | 44.672839           | 15.867613       | 21.322149                         |                   |                                   |                   |           |
|                     | 20.376315       | 22.615109           | 15.052113       | 20.588123                         |                   |                                   |                   |           |
|                     | 14.197648       | 21.887518           | 11.482612       | 19.271543                         |                   |                                   |                   |           |
|                     | 13.057888       | 21.302253           | 8.727793        | 15.223782                         |                   |                                   |                   |           |
| NHNH <sub>2</sub> * | 9.413289        | 20.010661           | 5.216415        | NH <sub>2</sub> NH <sub>3</sub> * | 11.550115         | NH <sub>3</sub> *                 | 3.720477          |           |
|                     | 7.802834        | 19.555510           | 3.925675        |                                   | 103.912119        |                                   |                   |           |
|                     | 7.015488        | 19.177672           | 2.907481        |                                   | 102.328655        |                                   |                   |           |
|                     | 104.206321      | 15.455280           | 103.722825      |                                   | 90.000304         |                                   |                   |           |
|                     | 101.663056      | 14.819534           | 103.326238      |                                   | 48.397866         |                                   |                   |           |
|                     | 44.936800       | 11.620448           | 103.278052      |                                   | 47.356418         |                                   |                   |           |
|                     | 20.873190       | 10.101209           | 100.961903      |                                   | 37.353623         |                                   |                   |           |
|                     | 20.375771       | 4.912740            | 100.321247      |                                   | 21.707731         |                                   |                   |           |
|                     | 20.065861       | 3.754114            | 48.319889       |                                   | 19.888795         |                                   |                   |           |
|                     | 17.867678       | 103.448070          | 48.152583       |                                   | 12.378780         |                                   |                   |           |
|                     | 16.605657       | 102.083820          | 44.526213       |                                   | 8.908488          |                                   |                   |           |
|                     | 15.177800       | 98.395050           | 35.530045       |                                   | 6.462117          |                                   |                   |           |
|                     | 14.986976       | 48.405084           | 21.132055       |                                   | 2.754420          |                                   |                   |           |
| 10.433108           | 47.925558       | 20.366897           |                 |                                   |                   |                                   |                   |           |
| 4.373095            | 37.592801       | 18.760908           |                 |                                   |                   |                                   |                   |           |

## References:

1. C. He, Z.-Y. Wu, L. Zhao, M. Ming, Y. Zhang, Y. P. Yi, J.-S. Hu, *ACS Catal.*, 2019, **9**, 7311-7317.
2. Z. Wang, F. Gong, L. Zhang, R. Wang, L. Ji, Q. Liu, Y. L. Luo, H. R. Guo, Y. H. Li, P. Gao, X. F. Shi, B. H. Li, B. Tang, X. P. Sun, *Adv. Sci.*, 2018, **6**, 1801182.
3. Q. Qin, Y. Zhao, M. Schmallegger, T. Heil, J. Schmidt, R. Walczak, G. Gescheidt-Demner, H. J. Jiao, M. Oschatz, *Angew. Chem. Int. Edit.*, 2019, **58**, 13101-13106.
4. L. Zhang, X. Q. Ji, X. Ren, Y. J. Ma, X. F. Shi, Z. Q. Tian, A. M. Asiri, L. Chen, B. Tang, X. P. Sun, *Adv. Mater.*, 2018, **30**, 1800191.
5. Y. F. Fang, Z. C. Liu, J. R. Han, Z. Y. Jin, Y. Q. Han, F. X. Wang, Y. S. Niu, Y. P. Wu, Y. H. Xu, *Adv. Energy Mater.*, 2019, **9**, 1803406.
6. Y.-X. Lin, S.-X. Zhang, Z.-H. Xue, J.-J. Zhang, H. Su, T.-J. Zhao, G.-Y. Zhai, X.-H. Li, X.-H. Li, M. Antonietti, J.-S. Chen, *Nat. Commun.*, 2019, **10**, 4380.
7. X. Q. Wang, W. Y. Wang, M. Qiao, G. Wu, W. X. Chen, T. W. Yuan, Q. Xu, M. Chen, Y. Zhang, X. Wang, J. Wang, J. Ge, X. Hong, Y. F. Li, Y. E. Wu, Y. D. Li, *Sci. Bull.*, 2018, **63**, 1246-1253.
8. Y. J. Chen, B. Wu, B. L. Sun, N. Wang, W. C. Hu, S. Komarneni, *ACS Sustainable Chem. Eng.*, 2019, **7**, 18874-18883.
